# Supplementary material for: Glioma Stem Cells Upregulate CD39 Expression to Escape Immune Response through SOX2 Modulation
Source: MDPI journal article supplement (doi:10.3390/cancers14030783), 2022-02-03
Supplement: s1 [file s1]

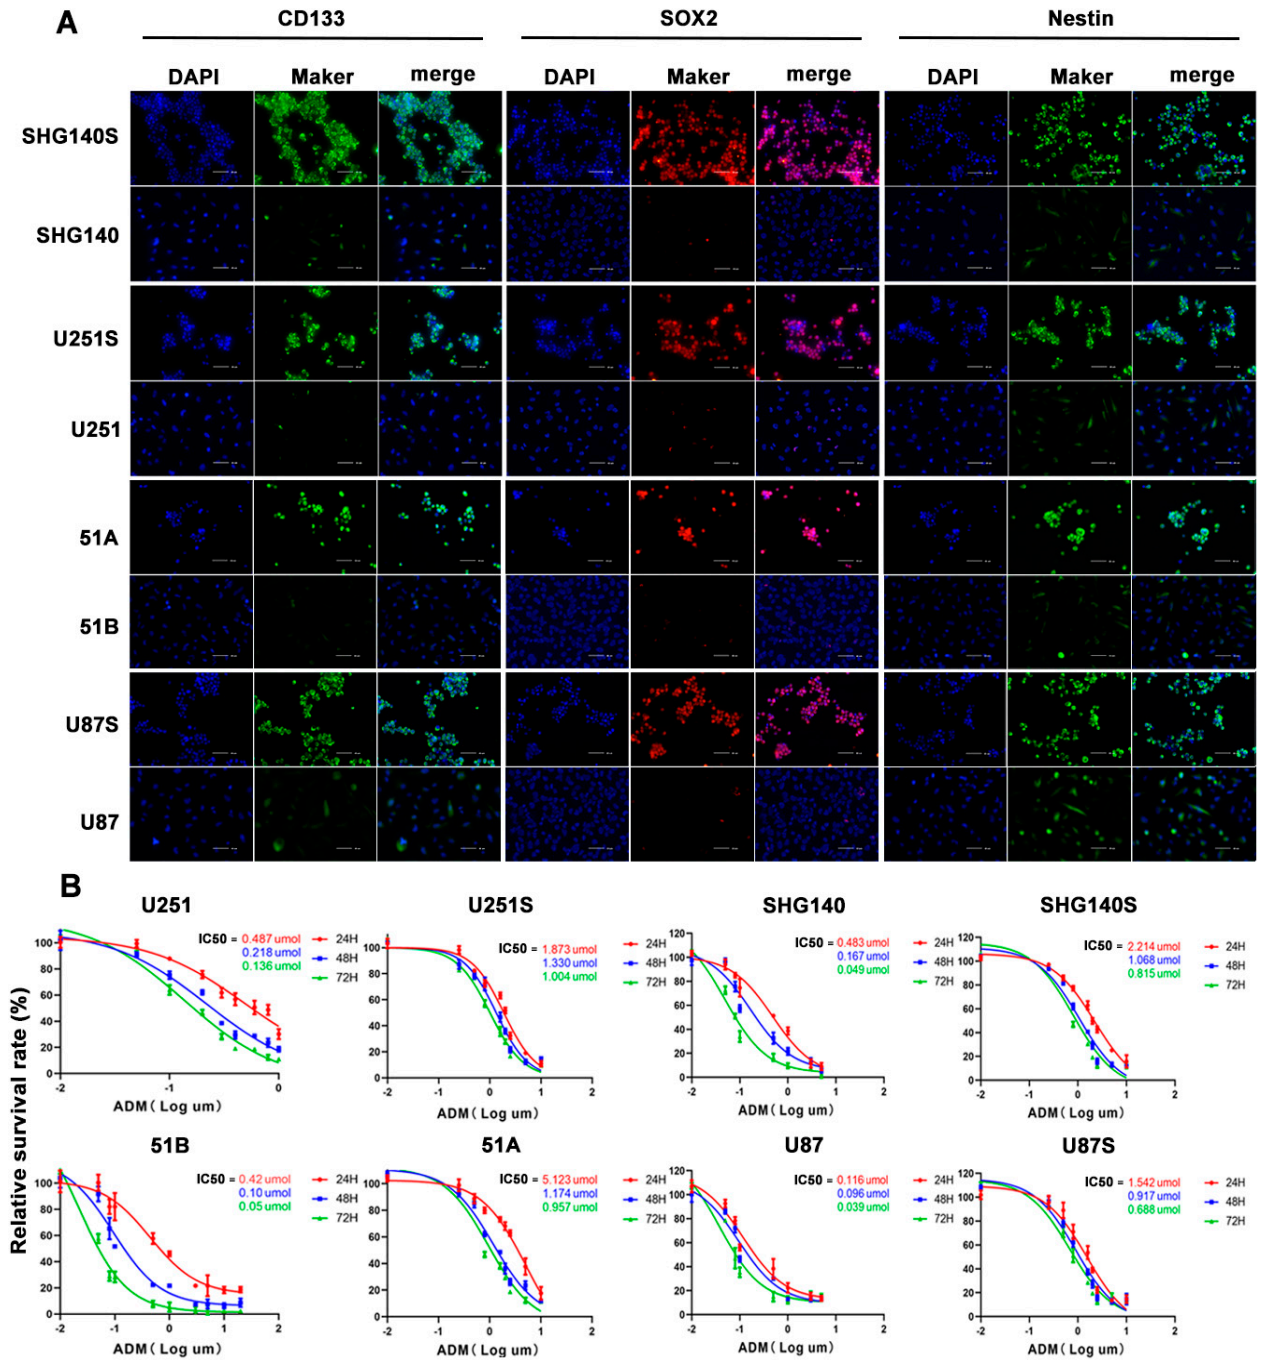

**Figure S1.** GSCs presented more stem cell markers and were more resistant for chemotherapy than non-GSCs. **(A)** Stem cell markers of GSCs and matched non-GSCs were detected by immunofluorescence. Scale bar = 40  $\mu\text{m}$ . **(B)** GSCs and matched non-GSCs were treated with ADM, and IC<sub>50</sub> was calculated. Data are represented as the mean  $\pm$  s.d.,  $n = 3$ . Concentration statistics were obtained with 95% confidence interval (CI). Data were analyzed by log-Nonlin fit.

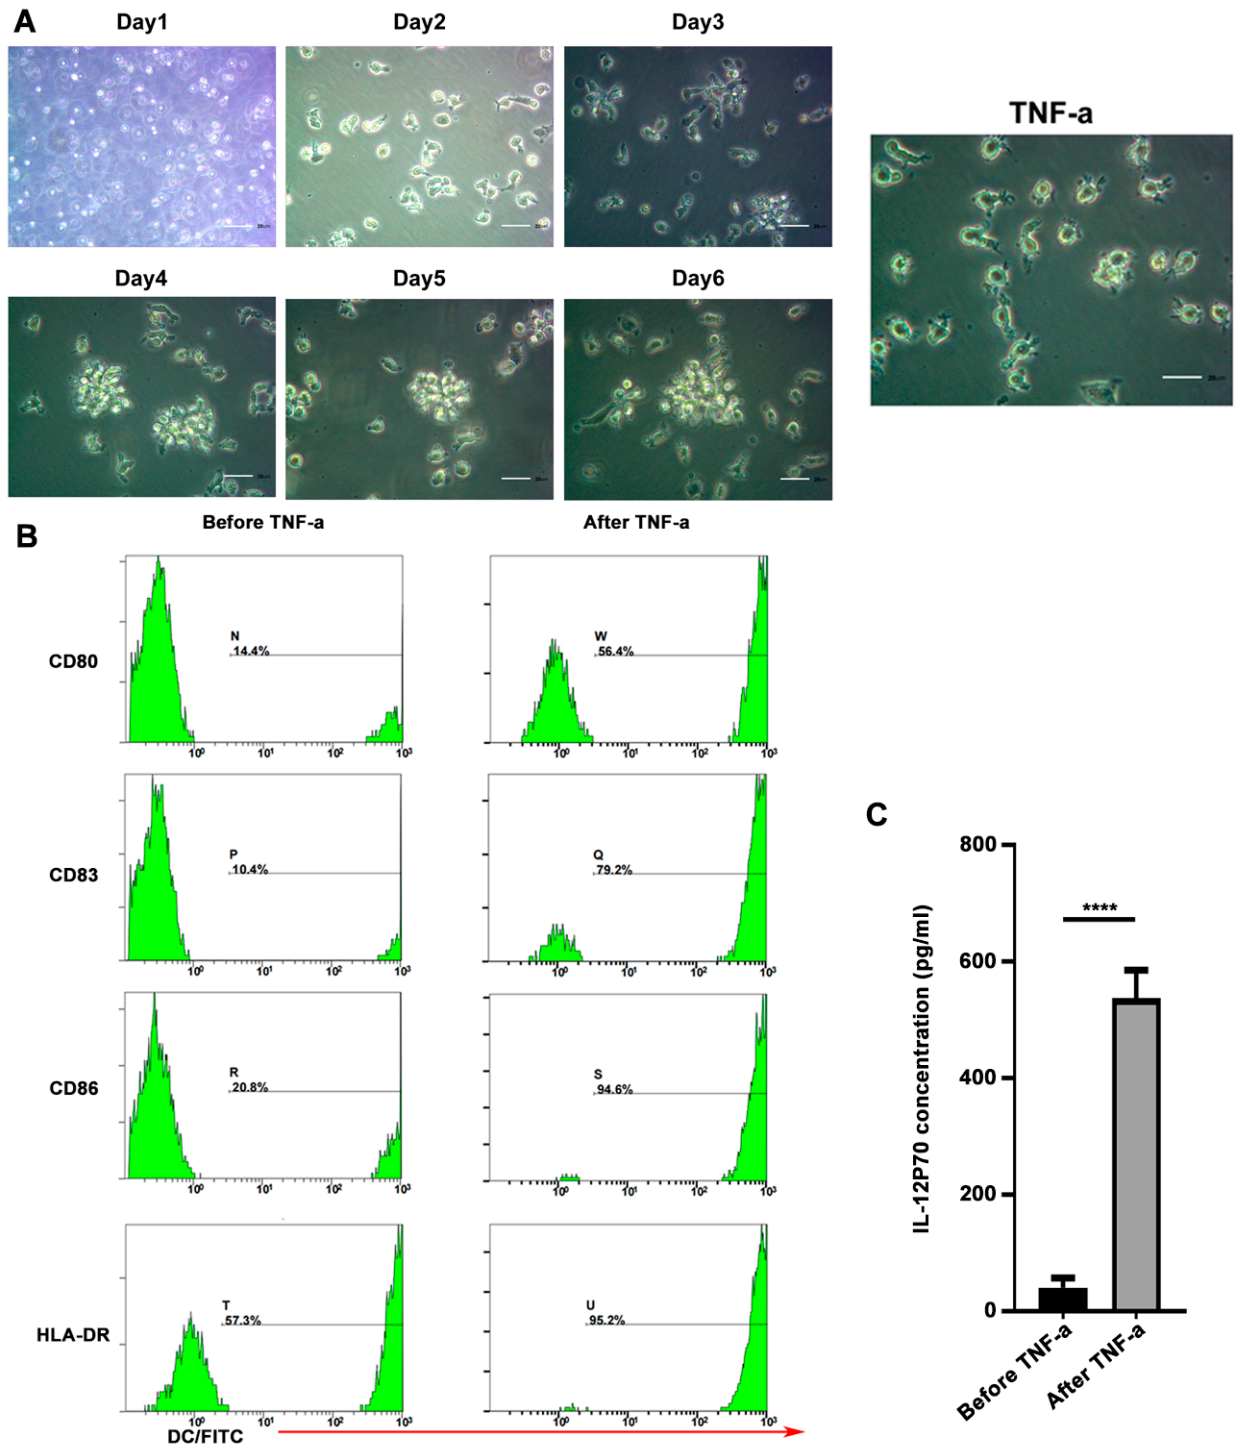

**Figure S2.** PBMCs were induced into functionally mature DCs after 1 week. (A) The morphological transformation of DCs was observed under a microscope on days 1–7. Scale bar corresponds to 20  $\mu$ m. (B) After 24 h of intervention with TNF-a, the functional transformation of DCs was analyzed by flow cytometry. (C) Cytokine production by DCs stimulated with addition of TNF-a analyzed by ELISA. Data are shown as the mean  $\pm$  s.d.,  $n = 3$ , \*\*\*\*  $p < 0.0001$ , Student's  $t$ -test.

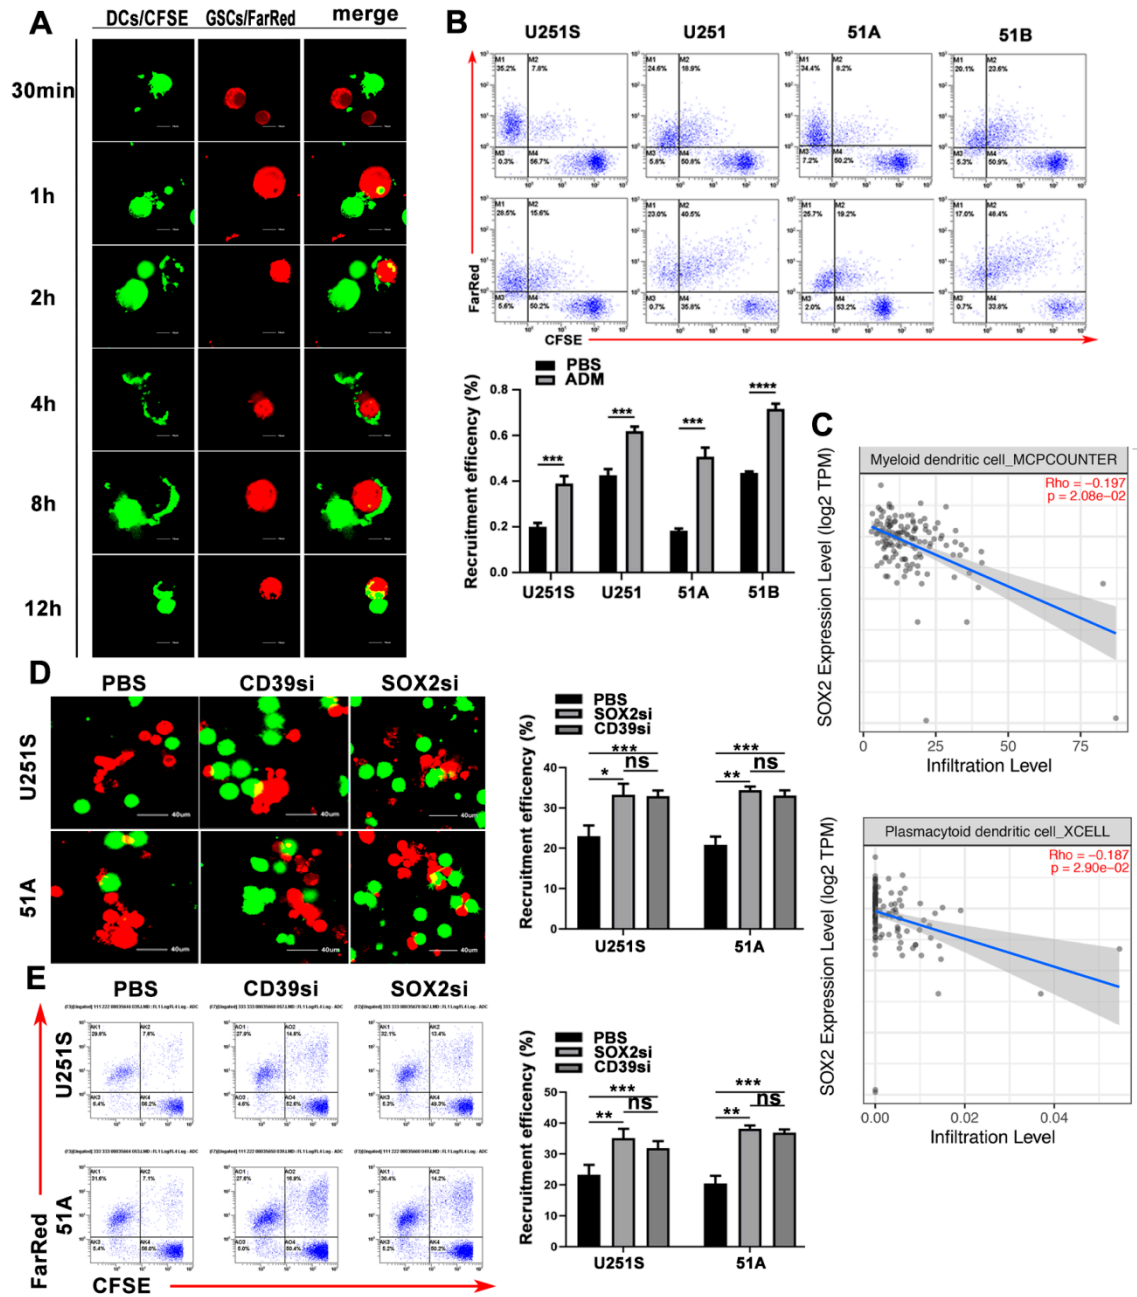

**Figure S3.** DCs gradually approach and phagocytize the GSCs. (A) The recruitment and phagocytosis of DCs were observed by confocal microscope. Scale bar corresponds to 10  $\mu$ m. (B) Flow cytometry analysis of the ability of DCs to recruit GSCs and matched non-GSCs. (C) The expression of SOX2 in glioma cells and the infiltration curve of DCs were analyzed by TIMER database. DCs were co-cultured with GSCs after intervention for 12 h, and the recruitment and phagocytosis of DCs were analyzed by confocal microscope (D) and flow cytometry (E). DCs were labeled by CFSE (green), and GSCs were labeled by Far Red (red). Scale bar = 40  $\mu$ m, Data are shown as the mean  $\pm$  s.d.,  $n = 5$ , NSP > 0.05, \*  $p < 0.05$ , \*\*  $p < 0.01$ , \*\*\*  $p < 0.001$ , \*\*\*\*  $p < 0.0001$ , Student's  $t$ -test.

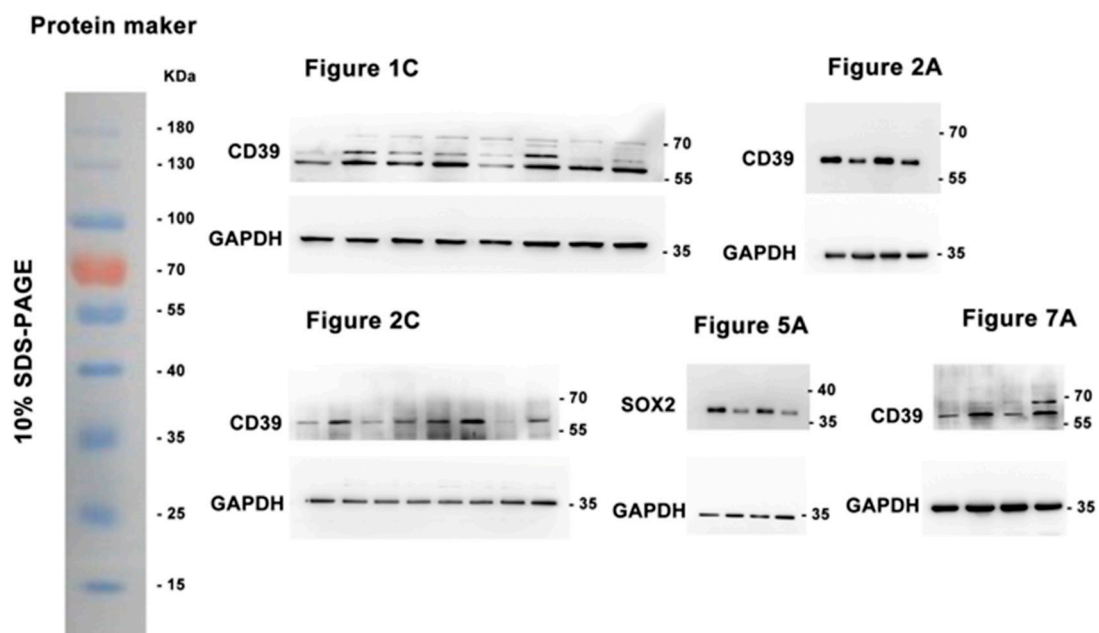

**Figure S4.** Uncropped Western Blots.
